# Supplementary material for: Optically probing nanoemulsion compositions
Source: Royal Society of Chemistry journal article supplement (doi:10.1039/c2cp23007k), 2012-01-01
Supplement: c2cp23007k.pdf [file c2cp23007k.pdf]

## Supplementary Information

### Optically Probing Nanoemulsion Compositions

**Xiaoming Zhu<sup>a</sup>, Michael M. Fryd<sup>a</sup>, Jung-Ren Huang<sup>a,†</sup>, and Thomas G. Mason<sup>a,b,c,\*</sup>**

<sup>a</sup> Department of Chemistry and Biochemistry, University of California-Los Angeles, 607 Charles Young Dr. East, Los Angeles, CA 90077 USA.

<sup>b</sup> Department of Physics and Astronomy, University of California-Los Angeles.

<sup>c</sup> California NanoSystems Institute, University of California-Los Angeles.

\* Corresponding author: [mason@chem.ucla.edu](mailto:mason@chem.ucla.edu)

<sup>†</sup> Present address: Department of Physics, National Taiwan Normal University, 88 Sec. 4, Ting-Chou Rd., Taipei 116, Taiwan.

#### Droplet Size Characterization

We use dynamic light scattering (DLS) at 90 degrees to measure the droplet radial size distributions of the 10 cSt PDMS/SDS/H<sub>2</sub>O oil-in-water nanoemulsions used in our experiments. All nanoemulsions have been made according to the process described in the main text and are diluted in water to a volume fraction  $\approx 10^{-5}$  for the DLS measurements. From the distributions, we extract average droplet radius  $\langle a \rangle$  and polydispersity. As  $C$  varies between 25 mM and 800 mM,  $\langle a \rangle$  ranges from 20 nm to 80 nm, as shown in Supplementary Figure 1. The polydispersity is approximately 0.3 for all samples. We find that over the range of  $\phi$  we examine in this study, there is no significant variation in  $\langle a \rangle$ , as has been found previously (see ref. <sup>2</sup>).

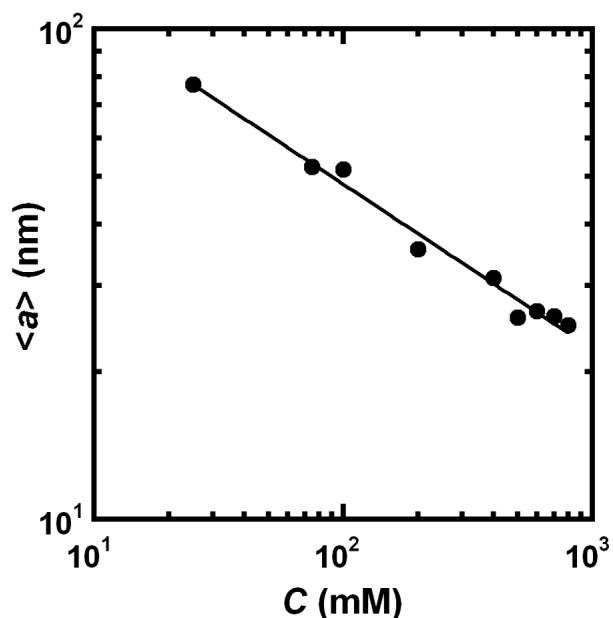

**Supplementary Figure 1.** For 10 cSt PDMS/SDS/H<sub>2</sub>O oil-in-water nanoemulsions,  $\langle a \rangle$  is plotted as a function of SDS surfactant concentration  $C$ ; the droplet volume fraction is fixed at  $\phi = 0.30$ . The solid line is an empirical fit to  $\langle a \rangle \sim C^{-1/3}$ . All measurements have been performed at a temperature of  $T = 21.0$  °C.

#### Normalized Refractive Index Difference: Insensitivity to Nanoscale Average Droplet Radius

We have measured the normalized refractive index difference  $\chi$  as a function of  $\langle a \rangle$  for 10 cSt PDMS/SDS/H<sub>2</sub>O oil-in-water nanoemulsions having fixed  $C = 100$  mM at several different  $\phi$ , as shown in Supplementary Figure 2. We find that, for a given  $\phi$ ,  $\chi$  is effectively independent of  $\langle a \rangle$ , provided  $\langle a \rangle < 100$  nm. Thus, at a fixed surfactant concentration, if the nanodroplets are small enough compared to the wavelength of probe light, only their volume fraction, and not their size, influences  $\chi$  significantly.

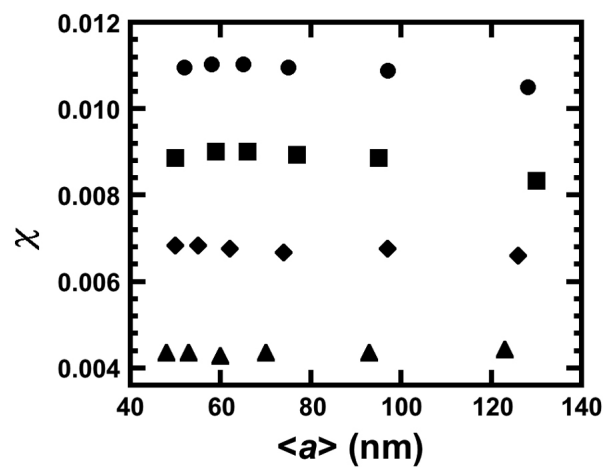

**Supplementary Figure 2.** For 10 cSt PDMS/SDS/H<sub>2</sub>O oil-in-water nanoemulsions, the normalized refractive index difference  $\chi$  is plotted against average droplet radius  $\langle a \rangle$  at fixed SDS surfactant concentration  $C = 100$  mM for a series of different  $\phi$ : 0.05 (▲), 0.1 (◆), 0.15 (■), and 0.2 (●). Provided  $\langle a \rangle < 100$  nm, there are only very small variations in the measured  $\chi(\langle a \rangle)$ , so  $\chi$  is insensitive to droplet size over the range we report in the main text. All measurements have been performed at a temperature of  $T = 21.0$  °C.
